# Supplementary material for: Sustainable seaweed-based one-dimensional (1D) nanofibers as high-performance electrocatalysts for fuel cells
Source: Royal Society of Chemistry journal article supplement (doi:10.1039/c5ta03199k), 2015-01-01
Supplement: c5ta03199k1.pdf [file c5ta03199k1.pdf]

## Supporting Information

### **Sustainable Seaweed-based One-dimensional (1D) Nanofibers as High-performance Electrocatalysts for Fuel Cells**

**Wei Zhao, Pei Yuan, Xilin She, Yanzhi Xia, Sridhar Komarneni, Kai Xi,  
YankeChe, Xiangdong Yao, and Dongjiang Yang**

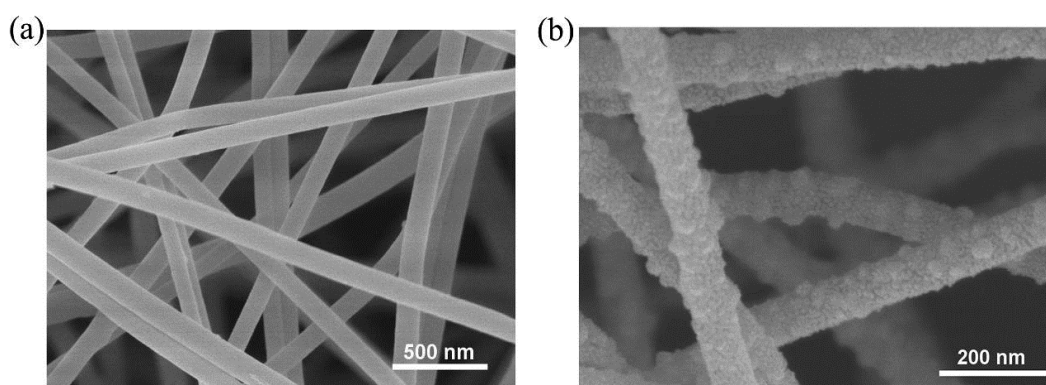

**Figure S1.** SEM images of (a) the as-synthesized SACNT-NF and (b) N-CACNT-NF.

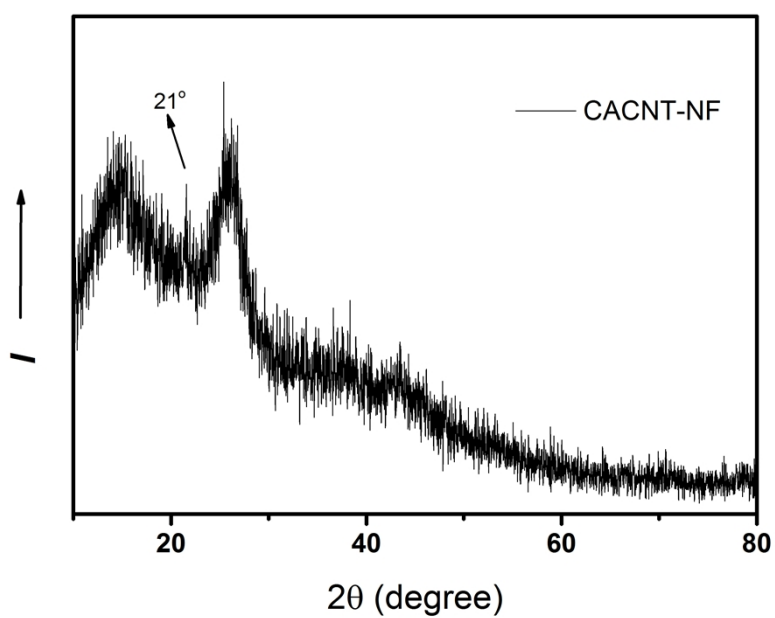

**Figure S2.** XRD patterns of the CACNT-NF

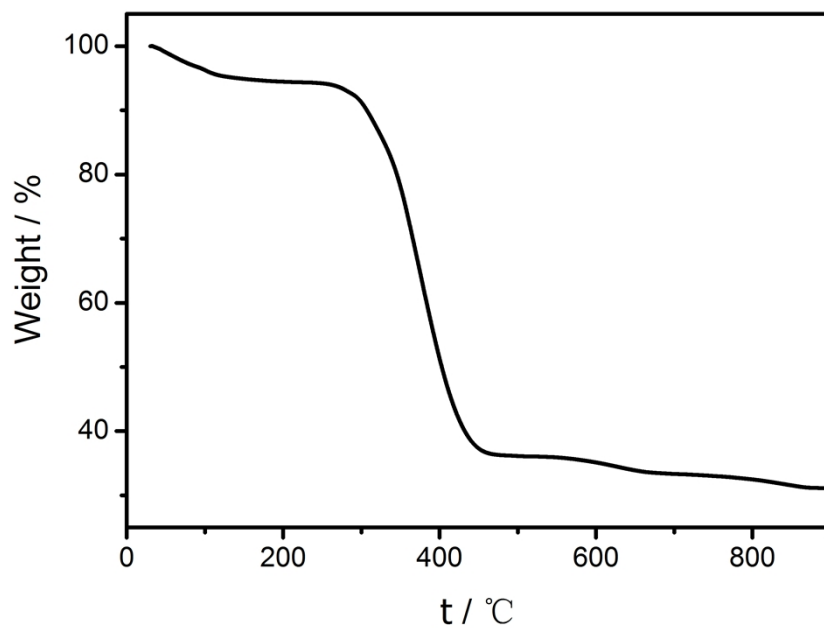

**Figure S3.** TGA weight change curves of N-CACNT-NF tested in air with a ramp rate of 10 °C/min.

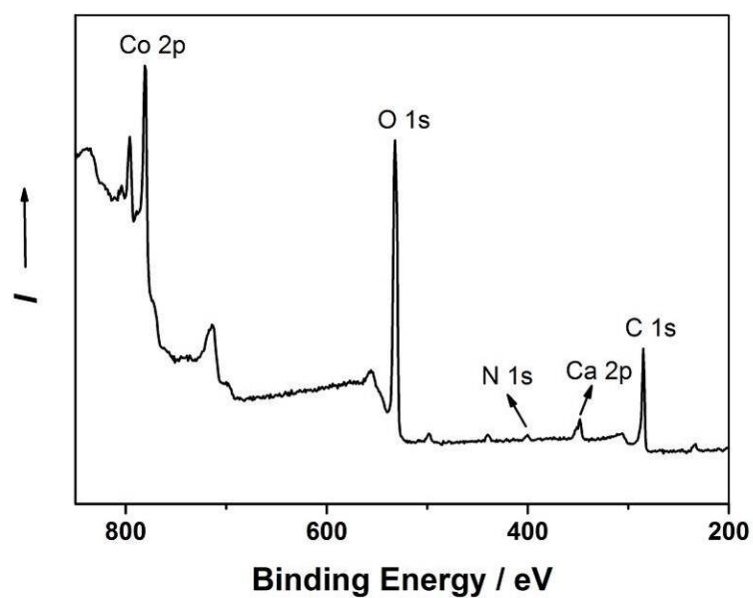

**Figure S4.** XPS survey for the as-synthesized N-CACNT-NF.

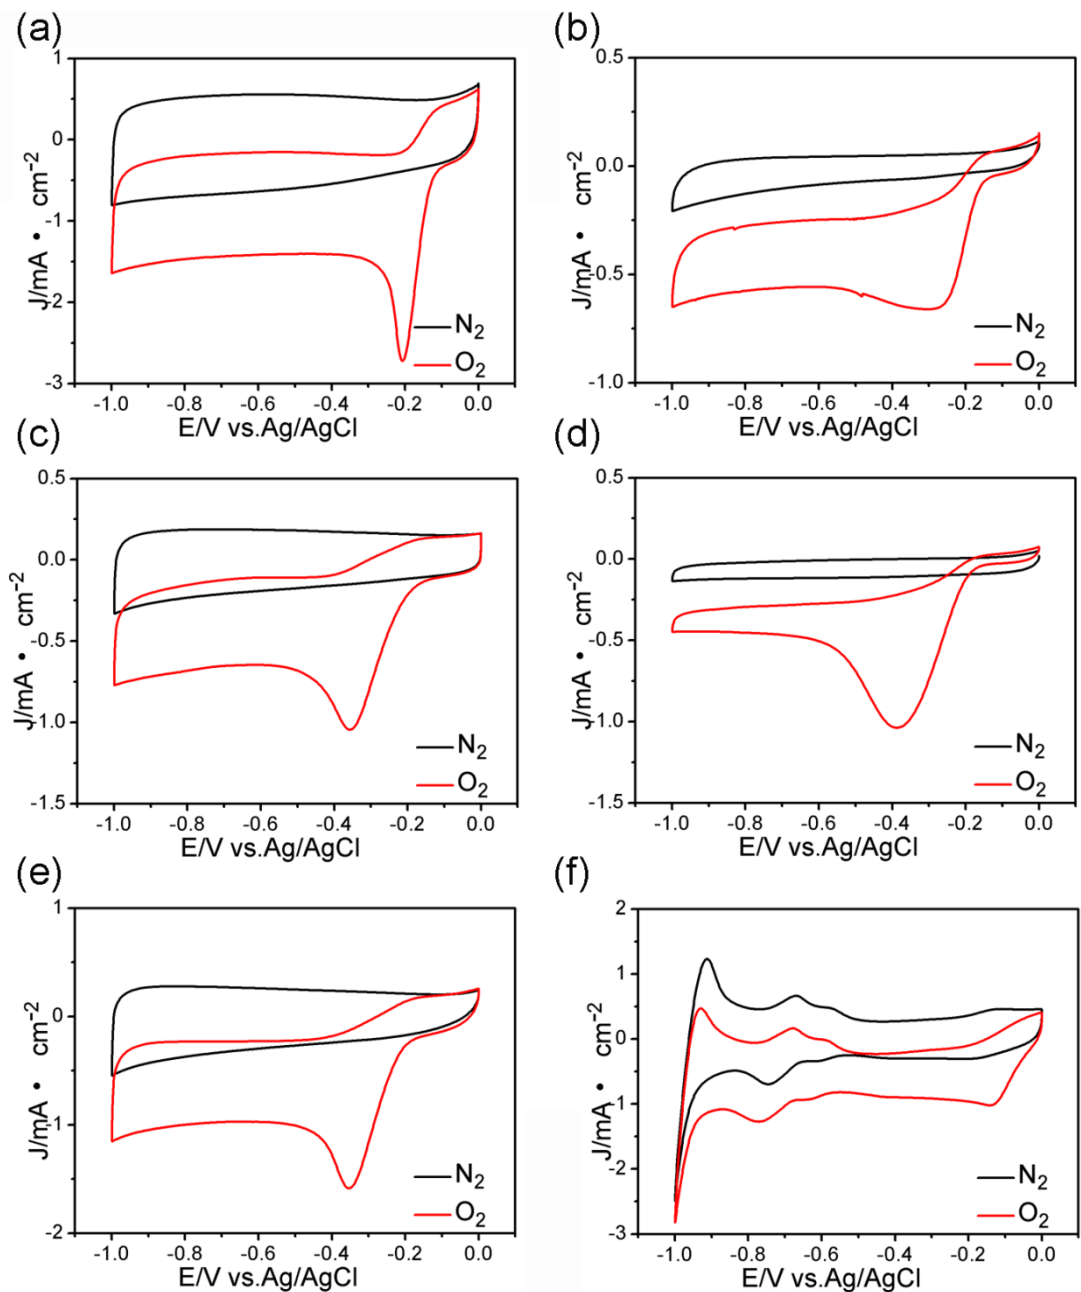

**Figure S5.** CV test results of (a) N-CACNT-NF, (b) N-CACNT, (c) N-CNTs, (d) N-CA-NF, (e) C-CACNT-NF and (f) 20% Pt/C in 0.1 M KOH aqueous solution saturated with N<sub>2</sub> and O<sub>2</sub>.

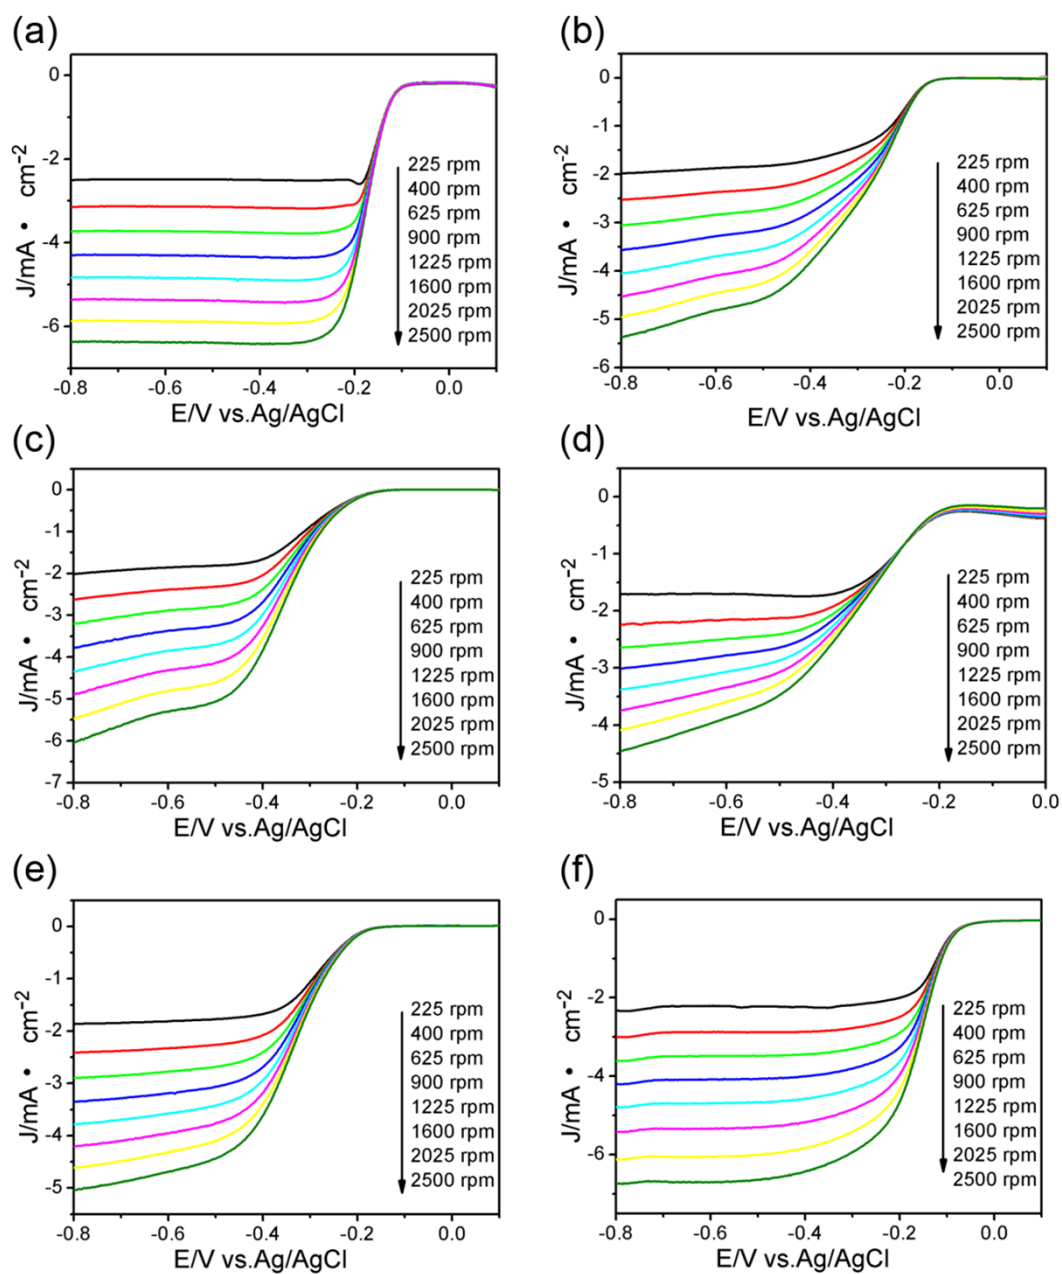

**Figure S6.** LSVs at different rotation speeds (from 225 to 2500 rpm) of (a) N-CACNT-NF, (b) N-CACNT, (c) N-CNTs, (d) N-CA-NF, (e) C-CACNT-NF and (f) 20% Pt/C.

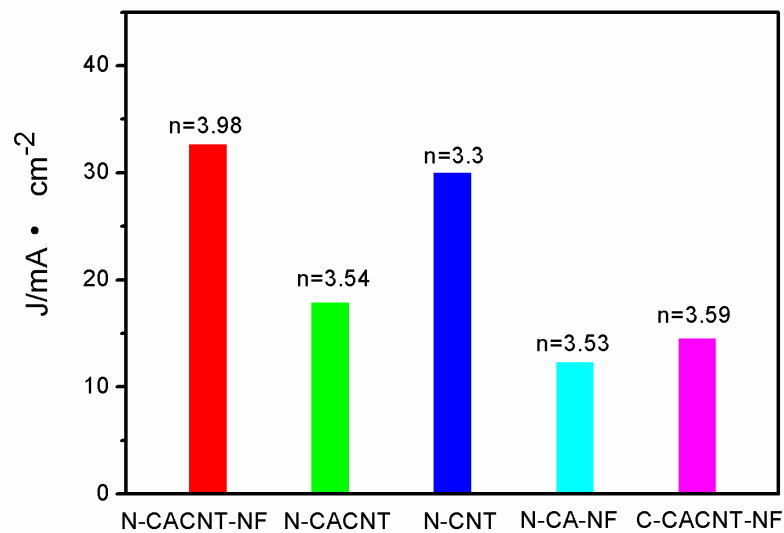

**Figure S7.** Electrochemical activity given as the fully diffusion-limited current density ( $J_K$ ) at -0.45 V for N-CACNT-NF, N-CACNT, N-CNTs, C-CA-NF and C-CACNT-NF.

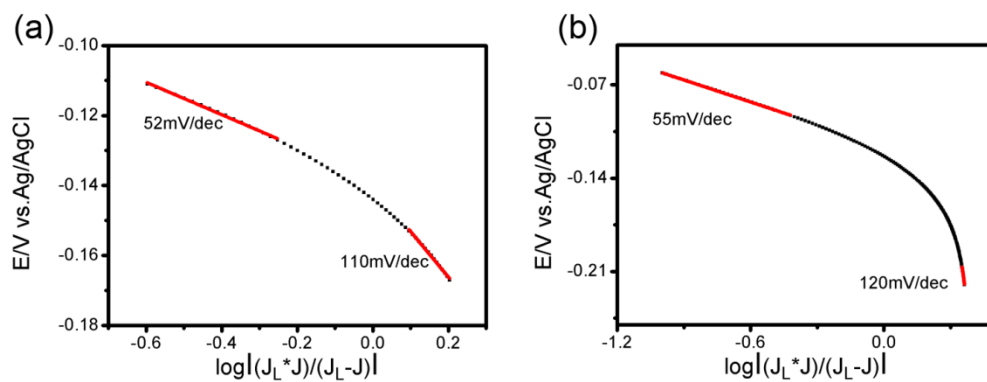

**Figure S8.** Linear fitting of Tafel plots at low and high over potentials regions for (a) N-CACNT-NF and (b) Pt/C.

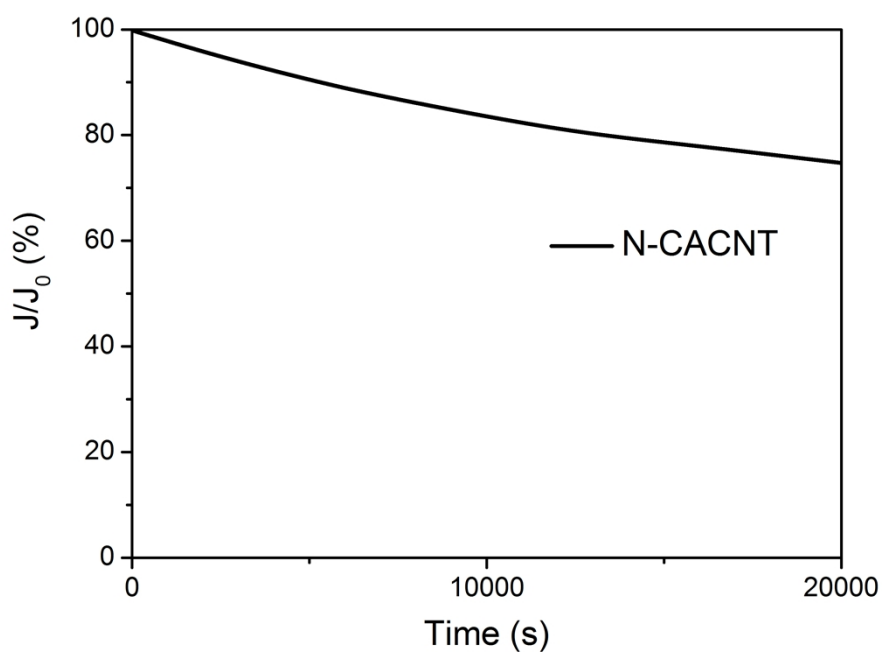

**Figure S9.** Long-term stability ( $-0.6$  V vs. Ag/AgCl) test of N-CACNT in 0.1 M KOH.

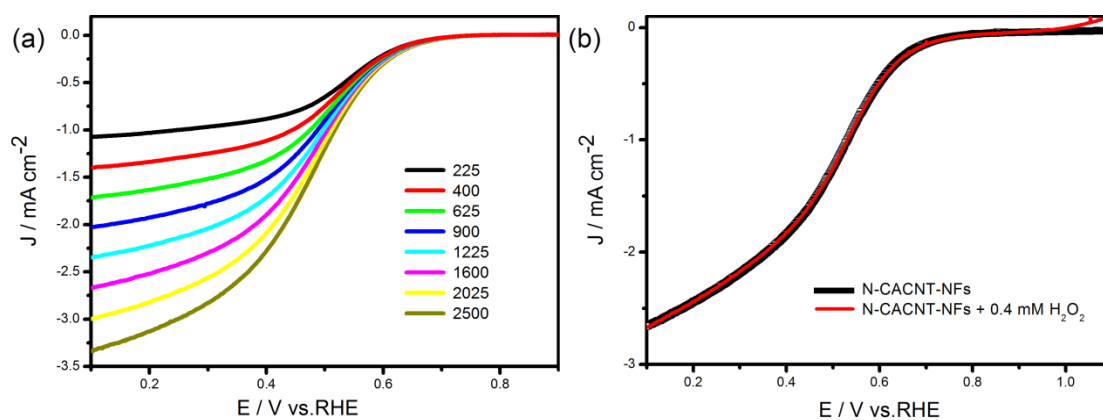

**Figure S10.** Voltamperograms for oxygen reduction on N-CACNT-NF (a) in  $O_2$ -saturated 1 M  $HClO_4$  at various rotation speeds with scan rate of 10 mV/s and (b) in  $O_2$ -saturated 1 M  $HClO_4$  at 1600 rpm before and after  $H_2O_2$  was added.

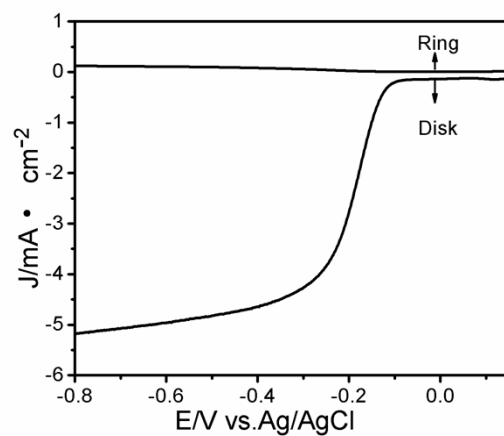

**Figure S11.** RRDE and RDE voltammograms at 1600 rpm in  $\text{O}_2$  saturated 0.1 M KOH solution.
